# Supplementary material for: Effect of Rocking Movements on Afternoon Sleep
Source: Front Neurosci. 2020 Jan 21;13:1446. doi: 10.3389/fnins.2019.01446 (PMC6985453; doi:10.3389/fnins.2019.01446)
Supplement: Supplementary file 1 [file Data_Sheet_1.docx]

**Supplementary material**

[**Effect of Rocking Movements on Afternoon Sleep**](https://www.frontiersin.org/Journal/Abstract.aspx?s=1852&name=Sleep_and_Circadian_Rhythms&ART_DOI=10.3389/fnins.2019.01446)

Rachel M. van Sluijs MSc1,2*, Quincy J. Rondei MSc1, Diana Schluep BSc1, Lukas Jäger PhD1, Robert Riener PhD1,2,3, Peter Achermann PhD2,4,5, Elisabeth Wilhelm PhD1,2

1Sensory-Motor Systems Lab, Institute of Robotic and Intelligent Systems, Department of Health Science and Technology, Swiss Federal Institute of Technology, Zurich, Switzerland

2Sleep & Health Zurich, University Center of Competence, University of Zurich, Zurich, Switzerland

3Medical Faculty, University of Zurich, Zurich, Switzerland

4The KEY Institute for Brain Mind Research, Department of Psychiatry, Psychotherapy and Psychosomatics, University Hospital of Psychiatry, Zurich, Switzerland

5Institute of Pharmacology and Toxicology, University of Zurich, Zurich, Switzerland

**Table S1. Demographics, mental state, sleep habits and sleep prior to the baseline nap of the low and high stimulation intensity group.** Susceptibility to motion sickness was assessed using the adults part of the Motion Sickness Susceptibility Questionnaire (MSSQ)(Golding, 2006), daytime sleepiness was assessed using the Epworth Sleepiness Scale (ESS) (Johns, 1991;Bloch et al., 1999), sleepiness was assessed using the Stanford Sleepiness Scale (SSS) (Hoddes et al., 1972), anxiety was assessed using the State-Trait Anxiety Questionnaire (STAY) (Knight et al., 1983) and sleep quality the night prior to the nap was assessed using the Groningen Sleep Quality Scale (GSQS) (Meijman et al., 1988). ** p < 0.01, two-sided independent t-test significant, a analysed sample for this analysis was n = 9 (low intensity group) and n = 11 (high intensity group).

|  | **Low intensity group**  **(n = 10)**  Mean (SD) | **High intensity group**  **(n = 12)**  Mean (SD) |
| --- | --- | --- |
| ***Demographics*** |  |  |
| Age (years) | 25.3 (4.5) | 24.8 (2.2) |
| Body mass index (kg/m2) | 23.4 (2.3) | 22.3 (1.9) |
| General health  (1 = bad, 5= excellent) | 4.4 (0.7) | 4.6 (0.7) |
| Sleep quality  (1 = bad, 5= excellent) | 4.2 (0.4) | 4.0 (0.9) |
| Day time sleepiness  (ESS: 0 = normal, 24 = severe excessive) | 6.2 (4.0) | 7.6 (2.8) |
| Susceptibility to motion sickness  (MSSQ: 0 = not susceptible, 27 = maximally susceptible) | 1.5 (1.3) | 1.1 (1.4) |
| Habitual bedtime (hh:mm) | 23:32 | 23:15 |
| Habitual wake time (hh:mm) | 7:38 | 7:16 |
| Habitual time in bed (h) | 8.1 (0.9) | 8.0 (0.7) |
|  |  |  |
| ***Night prior to baseline nap*** |  |  |
| Time in bed - subjective (h) | 8.0 (0.8) | 8.0 (0.7) |
| Assumed sleep time – actimetry (h) | 7.44 (1.1) | 8.06 (0.6) |
| Sleep efficiency - actimetry (%) | 77.8 (8.1) | 80.0 (8.8) |
| Sleep latency - actimetry (min) | 25 (20.5) | 14 (19) |
| Fragmentation index - actimetry | 40.0 (14.4) | 30.0 (10.8) |
| Sleep quality  (1 = bad, 5= excellent) | 4.2 (0.8) | 3.8 (1.1) |
| Sleep quality  (GSQS: 0 = excellent, 14 = poor) | 2.1 (3.0) | 2.6 (3.1) |
| Sleepiness  (SSS: 1 = wide awake, 7 = sleep onset soon) | 2.8 (1.2) | 2.5 (0.7) |
| State anxiety  (STAY: 20 = minimum, 80 = maximum) | 31.8 (9.5) | 31.0 (7.0) |
|  |  |  |
| ***Baseline nap (polysomnography)*** |  |  |
| Sleep efficiency (sleep time/time in bed %) | 76.4 (14.9) | 85.1 (13.1) |
| Latency to N2 (min) | 10.4 (2.9) | 8.7 (5.2) |
| Proportion of N3 (% total sleep time) ** | 9.9 (11.2) | 36.0 (21.8) |
| Sleep spindle density (#/30s) a | 2.3 (1.4) | 2.8 (1.3) |

**Table S2. Sleep on the night prior to the nap.** Measures based on actiwatch worn on the non-dominant wrist. Time in bed (TIB), total sleep time (TST), sleep efficiency, sleep onset latency (SOL), fragmentation index and number of arousals are reported. P-values relate to the main effect of condition in a linear mixed-effects model with fixed effects of condition, measurement date and their interaction, and participant as random effect estimated for each outcome variable separately. Stars refer to a main effect of measurement date.

|  | **Baseline** |  | **Low** |  | **Medium** |  |  |
| --- | --- | --- | --- | --- | --- | --- | --- |
|  | **M** | **SD** | **M** | **SD** | **M** | **SD** | **p** |
| TIB (h) | 8.0 | 0.8 | 8.0 | 0.3 | 8.2 | 0.8 | 0.17 |
| TST (h) | 7.4 | 1.1 | 7.5 | 0.7 | 7.6 | 1.0 | 0.98 |
| Sleep efficiency (%) | 83.4 | 6.0 | 79.6 | 10.0 | 89.1 | 4.4 | 0.44 |
| SOL | 5.4 | 10.1 | 13.7 | 12.4 | 9.8 | 12.2 | 0.49 |
| Fragmentation index | 40.0 | 14.4 | 51.9 | 22.5 | 32.4 | 11.4 | 0.39 |
| Arousals (#) | 33.6 | 7.0 | 36.9 | 10.2 | 26.8 | 8.9 | 0.28 |
|  |  |  |  |  |  |  |  |
|  | **Baseline** |  | **Medium** |  | **High** |  |  |
|  | **M** | **SD** | **M** | **SD** | **M** | **SD** | **p** |
| TIB (h) | 8.4 | 0.7 | 8.4 | 0.8 | 7.9 | 1.1 | 0.32 |
| TST (h) | 8.1 | 0.6 | 8.2 | 0.9 | 7.7 | 1.2 | 0.42 |
| Sleep efficiency (%) | 82.9 | 8.1 | 83.0 | 5.7 | 82.6 | 10.7 | 0.41 |
| SOL | 16.3 | 10.8 | 14.5 | 11.5 | 13.2 | 11.7 | 0.45 |
| **Fragmentation index** | 30.0 | 10.8 | 35.5 | 12.9 | 35.0 | 14.4 | 0.04 |
| Arousals (#) | 33.9 | 11.0 | 36.4 | 7.5 | 29.4 | 12.7 | 0.38 |
|  |  |  |  |  |  |  |  |
|  | **Baseline** |  | **Medium** |  |  |  |  |
|  | **M** | **SD** | **M** | **SD** | **p** |  |  |
| TIB (h) | 8.2 | 0.7 | 8.3 | 0.8 | 0.67 |  |  |
| TST (h) | 7.9 | 0.8 | 8.0 | 0.9 | 0.63 |  |  |
| Sleep efficiency (%) | 83.1 | 7.3 | 85.4 | 5.9 | 0.43 |  |  |
| SOL | 12.7 | 11.5 | 12.7 | 11.5 | 0.98 |  |  |
| Fragmentation index | 33.3 | 12.6 | 34.3 | 11.9 | 0.43* |  |  |
| Arousals (#) | 33.8 | 9.6 | 32.7 | 9.1 | 0.87* |  |  |

**Table S3. Sleep Architecture.** Each 20-s epoch of the recordings was visually attributed to a sleep stage according to AASM criteria (Iber et al., 2007) by a blinded scorer. Latencies, durations and stage changes were derived from the visual scoring. Artefacts were marked during visual inspection of the data. A linear mixed-effects model for interaction between experimental condition and stage on latency to or duration of a specific sleep stage, with participant as random factor was compared to a null-model without the interaction term. P-values in the top row represent relate to the comparison of these two models using a χ2 goodness of fit test. P-values within the tables relate to repeated measures ANOVA comparing means of the different conditions. Only p-values below < 0.05 are reported.

|  | **Baseline** | | **Low** | | | **Medium** | | |  | |  | **Baseline** | | **Medium** | | **High** | |  |
| --- | --- | --- | --- | --- | --- | --- | --- | --- | --- | --- | --- | --- | --- | --- | --- | --- | --- | --- |
|  | **M** | ***SD*** | | **M** | ***SD*** | | **M** | ***SD*** | | **p** |  | **M** | ***SD*** | **M** | ***SD*** | **M** | ***SD*** | p |
| **Latencies (min)** |  |  | |  |  | |  |  | | < 0.001 |  |  |  |  |  |  |  |  |
| N1 | 3.8 | *2.4* | | 5.8 | *4.1* | | 5.3 | *4.0* | |  |  | 4.2 | *3.0* | 4.8 | *2.7* | 4.8 | *2.9* |  |
| N2 | 10.4 | *2.9* | | 13.7 | *8.5* | | 10.8 | *5.2* | |  |  | 8.7 | *5.2* | 11.3 | *6.1* | 10.9 | *5.2* |  |
| N3 | 37.6 | *8.2* | | 30.0 | *7.5* | | 30.5 | *7.0* | | 0.037 |  | 23.8 | *9.6* | 30.5 | *12.0* | 29.6 | *11.5* |  |
|  |  |  | |  |  | |  |  | |  |  |  |  |  |  |  |  |  |
| **Duration (min)** |  |  | |  |  | |  |  | | < 0.001 |  |  |  |  |  |  |  |  |
| initial N1 | 6.6 | *3.1* | | 7.9 | *6.6* | | 5.5 | *2.8* | |  |  | 4.5 | *3.5* | 6.4 | *4.5* | 6.1 | *4.0* |  |
| initial N2 | 27.2 | *9.0* | | 16.2 | *3.7* | | 19.7 | *7.0* | | 0.005 |  | 15.1 | *6.9* | 19.3 | *9.8* | 18.7 | *9.6* |  |
|  |  |  | |  |  | |  |  | |  |  |  |  |  |  |  |  |  |
| **Duration (%TSP)** |  |  | |  |  | |  |  | | 0.003 |  |  |  |  |  |  |  |  |
| WASO | 9.4 | *16.5* | | 3.0 | *6.4* | | 2.7 | *3.1* | |  |  | 5.4 | *13.7* | 3.9 | *6.0* | 1.6 | *2.9* |  |
| N1 | 22.1 | *11.5* | | 6.1 | *8.2* | | 12.2 | *9.9* | | 0.005 |  | 11.3 | *14.0* | 11.1 | *10.4* | 9.4 | *10.5* |  |
| N2 | 56.9 | *17.7* | | 63.7 | *21.9* | | 51.1 | *20.2* | |  |  | 44.7 | *15.9* | 58.3 | *22.0* | 52.3 | *25.4* |  |
| N3 | 11.3 | *13.7* | | 27.3 | *22.6* | | 33.9 | *24.8* | | 0.031 |  | 38.7 | *24.1* | 26.7 | *25.8* | 36.7 | *31.9* |  |
| Sleep efficiency | 90.2 | *16.6* | | 97.0 | *6.4* | | 97.2 | *3.2* | |  |  | 94.6 | *13.7* | 96.1 | *6.0* | 98.4 | *2.9* |  |
|  |  |  | |  |  | |  |  | |  |  |  |  |  |  |  |  |  |
| **Sleep fragmentation** |  |  | |  |  | |  |  | |  |  |  |  |  |  |  |  |  |
| # stage changes | 23.8 | *10.2* | | 13.9 | *8.6* | | 16.3 | *11.0* | | 0.006 |  | 16.2 | *9.0* | 19.1 | *6.7* | 16.6 | *6.3* |  |
| # artefacts | 9.0 | *6.5* | | 5.8 | *7.0* | | 6.9 | *6.5* | |  |  | 6.7 | *11.2* | 10.8 | *11.0* | 9.7 | *13.5* |  |

**Table S4. EEG power in several frequency bands during NREM sleep and during stages N2 and N3 separately.** Delta (δ, 0.75 – 4.5 Hz), theta (θ, 4.5 – 9 Hz), alpha (α, 9 – 12 Hz), sigma (σ, 12 - 15 Hz) and beta (β, 15 – 25 Hz) power are reported. P-values relate to repeated measures ANOVA comparing the means of the different conditions. Only p-values below < 0.05 are reported.

|  | **Baseline** | | **Low** | | **Medium** | |  |  | **Baseline** | | **Medium** | | **High** | |  |
| --- | --- | --- | --- | --- | --- | --- | --- | --- | --- | --- | --- | --- | --- | --- | --- |
|  | **M** | ***SD*** | **M** | ***SD*** | **M** | ***SD*** | ***p*** |  | **M** | ***SD*** | **M** | ***SD*** | **M** | ***SD*** | ***p*** |
| **NREM sleep** | **n = 9** |  |  |  |  |  |  |  | n=11 |  |  |  |  |  |  |
| **δ (µV²)** | 59.1 | *30.6* | 67.6 | *26.4* | 83.7 | *25.1* |  |  | 114.7 | *69.9* | 100.1 | *90.8* | 114.0 | *89.1* |  |
| **θ (µV²)** | 8.4 | *2.4* | 8.1 | *1.5* | 7.7 | *1.5* |  |  | 10.1 | *4.9* | 9.5 | *4.8* | 9.8 | *5.3* |  |
| **α (µV²)** | 3.3 | *1.3* | 3.3 | *0.9* | 3.0 | *1.2* |  |  | 3.8 | *1.7* | 3.9 | *1.7* | 3.4 | *1.7* |  |
| **σ (µV²)** | 2.8 | *1.1* | 2.6 | *0.8* | 2.4 | *0.9* |  |  | 3.9 | *2.3* | 4.0 | *2.2* | 3.3 | *2.2* |  |
| **β (µV²)** | 0.6 | *0.3* | 0.6 | *0.2* | 0.5 | *0.2* |  |  | 0.5 | *0.3* | 0.7 | *0.3* | 0.6 | *0.3* |  |
|  |  |  |  |  |  |  |  |  |  |  |  |  |  |  |  |
| **N2** | n = 9 |  |  |  |  |  |  |  | n=11 |  |  |  |  |  |  |
| **δ (µV²)** | 50.2 | *28.0* | 42.5 | *12.5* | 47.6 | *24.1* |  |  | 56.3 | *28.8* | 57.9 | *40.6* | 45.5 | *22.9* |  |
| **θ (µV²)** | 8.0 | *2.6* | 7.5 | *1.7* | 7.3 | *1.9* |  |  | 9.2 | *4.7* | 9.0 | *4.6* | 8.8 | *4.8* |  |
| **α (µV²)** | 3.2 | *1.2* | 3.2 | *0.8* | 3.0 | *1.1* |  |  | 3.9 | *1.7* | 4.0 | *1.7* | 3.7 | *2.4* |  |
| **σ (µV²)** | 2.8 | *1.0* | 2.8 | *0.9* | 2.6 | *0.8* |  |  | 3.8 | *1.7* | 4.2 | *2.4* | 3.5 | *2.1* |  |
| **β (µV²)** | 0.6 | *0.3* | 0.6 | *0.2* | 0.6 | *0.2* |  |  | 0.6 | *0.3* | 0.7 | *0.3* | 0.6 | *0.3* |  |
|  |  |  |  |  |  |  |  |  |  |  |  |  |  |  |  |
| **N3** | n = 9 |  |  |  |  |  |  |  | n=11 |  |  |  |  |  |  |
| **δ (µV²)** | 106.4 | *32.7* | 126.1 | *35.6* | 118.7 | *35.5* | 0.03 |  | 164.4 | *85.0* | 166.7 | *110.8* | 214.9 | *83.4* |  |
| **θ (µV²)** | 9.3 | *1.9* | 9.7 | *1.5* | 7.9 | *1.4* |  |  | 12.0 | *6.6* | 10.0 | *5.5* | 13.0 | *5.6* |  |
| **α (µV²)** | 3.8 | *2.0* | 3.6 | *1.2* | 2.8 | *1.1* |  |  | 3.8 | *2.4* | 3.8 | *2.1* | 3.4 | *1.9* |  |
| **σ (µV²)** | 3.1 | *1.8* | 2.6 | *1.0* | 2.0 | *0.7* |  |  | 4.0 | *3.5* | 4.1 | *3.0* | 3.5 | *3.2* |  |
| **β (µV²)** | 0.6 | *0.4* | 0.5 | *0.2* | 0.4 | *0.2* |  |  | 0.4 | *0.2* | 0.5 | *0.3* | 0.4 | *0.2* | 0.04 |

**Table S5. Slow waves occurring during all NREM sleep and during stages N2 and N3 separately.** P-values relate to a repeated measures ANOVA comparing means of the different conditions. Only p-values below < 0.05 are reported.

|  | **Baseline** | | **Low** | |  | | | **Medium** | |  | |  | **Baseline** | | **Medium** | | **High** | | |  | |  | |
| --- | --- | --- | --- | --- | --- | --- | --- | --- | --- | --- | --- | --- | --- | --- | --- | --- | --- | --- | --- | --- | --- | --- | --- |
|  | **M** | ***SD*** | | **M** | | ***SD*** | **M** | | ***SD*** | |  |  | **M** | ***SD*** | | **M** | | ***SD*** | **M** | | ***SD*** | |  |
| **NREM** |  |  | |  | |  |  | |  | |  |  |  |  | |  | |  |  | |  | |  |
| Count (#) | 194.3 | *212.9* | | 331.0 | | *288.5* | 428.8 | | *233.3* | |  |  | 572.6 | *389.3* | | 447.9 | | *451.6* | 540.5 | | *406.6* | |  |
| Density (#/20s) | 4.0 | *2.1* | | 5.4 | | *2.7* | 6.6 | | *2.3* | | 0.02 |  | 7.1 | *2.9* | | 5.7 | | *3.6* | 6.5 | | *3.1* | |  |
| Frequency (Hz) | 0.7 | *0.1* | | 0.7 | | *0.0* | 0.7 | | *0.0* | |  |  | 0.7 | *0.0* | | 0.7 | | *0.1* | 0.7 | | *0.0* | |  |
| Duration (s) | 1.5 | *0.2* | | 1.4 | | *0.1* | 1.4 | | *0.1* | |  |  | 1.4 | *0.1* | | 1.4 | | *0.2* | 1.4 | | *0.1* | |  |
| Amplitude (µV) | 46.5 | *13.5* | | 44.2 | | *6.5* | 44.6 | | *8.4* | |  |  | 44.7 | *6.0* | | 42.0 | | *8.6* | 46.7 | | *6.8* | |  |
|  |  |  | |  | |  |  | |  | |  |  |  |  | |  | |  |  | |  | |  |
| **N2** |  |  | |  | |  |  | |  | |  |  |  |  | |  | |  |  | |  | |  |
| Count (#) | 96.3 | *68.6* | | 77.7 | | *57.9* | 77.2 | | *42.0* | |  |  | 105.0 | *61.6* | | 166.3 | | *149.6* | 85.9 | | *70.5* | |  |
| Density (#/20s) | 3.0 | *1.2* | | 2.9 | | *0.7* | 3.0 | | *0.7* | |  |  | 3.2 | *1.0* | | 4.1 | | *2.3* | 3.0 | | *1.0* | |  |
| Frequency (Hz) | 0.7 | *0.1* | | 0.7 | | *0.0* | 0.8 | | *0.1* | |  |  | 0.7 | *0.0* | | 0.7 | | *0.1* | 0.7 | | *0.0* | |  |
| Duration (s) | 1.5 | *0.2* | | 1.4 | | *0.1* | 1.4 | | *0.1* | |  |  | 1.4 | *0.1* | | 1.5 | | *0.2* | 1.4 | | *0.1* | |  |
| Ampltude (µV) | 49.4 | *19.5* | | 40.9 | | *7.3* | 39.3 | | *10.6* | |  |  | 40.3 | *6.0* | | 39.0 | | *5.9* | 38.8 | | *4.0* | |  |
|  |  |  | |  | |  |  | |  | |  |  |  |  | |  | |  |  | |  | |  |
| **N3** |  |  | |  | |  |  | |  | |  |  |  |  | |  | |  |  | |  | |  |
| Count (#) | 98.0 | *171.7* | | 253.3 | | *282.5* | 351.6 | | *269.7* | | 0.03 |  | 467.6 | *386.0* | | 281.6 | | *375.0* | 454.6 | | *397.0* | |  |
| Density (#/20s) | 7.8 | *3.0* | | 9.1 | | *3.2* | 9.1 | | *3.0* | |  |  | 9.8 | *3.4* | | 9.1 | | *3.9* | 10.7 | | *2.2* | |  |
| Frequency (Hz) | 0.7 | *0.0* | | 0.7 | | *0.0* | 0.7 | | *0.0* | |  |  | 0.8 | *0.0* | | 0.7 | | *0.1* | 0.7 | | *0.0* | |  |
| Duration (s) | 1.4 | *0.1* | | 1.4 | | *0.0* | 1.4 | | *0.0* | |  |  | 1.4 | *0.1* | | 1.4 | | *0.1* | 1.4 | | *0.1* | |  |
| Ampltude (µV) | 42.0 | *6.4* | | 45.6 | | *7.9* | 42.8 | | *5.4* | |  |  | 44.2 | *7.2* | | 46.0 | | *8.2* | 49.5 | | *8.1* | |  |

**Table S6. Sleep spindles and memory task performance.** Spindles with a frequency between 12 – 15 Hz and a duration between 0.5 and 3 s were automatically detected.The average frequency, duration, peak amplitude, integrated absolute amplitude and activity (integrated absolute amplitude/min) of each spindle were determined. Performance on a word-pair task testing declarative memory. Immediate recall (IR) took place directly after learning the word pairs 1 hour before lights off. Delayed recall (DR) took place 30 min after lights on. Participants who were not native German speakers were excluded from the word-pair task analysis. P-values relate to repeated measures ANOVA comparing means of the different conditions. Only p-values below < 0.05 are reported.

|  | **Baseline** | | **Low** | | | **Medium** | | |  | |  | **Baseline** | | **Medium** | | | **High** | | |  | |
| --- | --- | --- | --- | --- | --- | --- | --- | --- | --- | --- | --- | --- | --- | --- | --- | --- | --- | --- | --- | --- | --- |
|  | **M** | ***SD*** | | **M** | ***SD*** | | **M** | ***SD*** | | **p** |  | **M** | ***SD*** | | **M** | ***SD*** | | **M** | ***SD*** | | **p** |
| **Spindles** | n=10 |  | |  |  | |  |  | |  |  | n=11 |  | |  |  | |  |  | |  |
| Count (#) | 26.67 | *15.93* | | 33.11 | *19.60* | | 47.00 | *23.32* | | 0.02 |  | 57.55 | *37.66* | | 49.82 | *42.22* | | 47.91 | *30.62* | |  |
| Density (#/20s) | 1.56 | *0.91* | | 1.53 | *0.51* | | 1.78 | *0.93* | |  |  | 1.86 | *0.89* | | 1.95 | *1.15* | | 1.84 | *0.68* | |  |
| Duration (s) | 1.13 | *0.26* | | 1.02 | *0.23* | | 1.03 | *0.20* | |  |  | 1.14 | *0.19* | | 1.09 | *0.12* | | 1.10 | *0.14* | |  |
| Peak amplitude (µV) | 34.32 | *53.82* | | 15.08 | *2.35* | | 14.30 | *2.56* | |  |  | 16.28 | *2.76* | | 16.96 | *2.00* | | 15.80 | *2.70* | |  |
| Mean frequency (Hz) | 13.93 | *0.25* | | 13.99 | *0.18* | | 14.00 | *0.27* | |  |  | 14.00 | *0.27* | | 13.88 | *0.28* | | 13.91 | *0.20* | |  |
| Integrated amplitude (µV) | 1518 | *2081* | | 732 | *275* | | 692 | *231* | |  |  | 872 | *252* | | 855 | *167* | | 833 | *256* | |  |
| Activity (µV/min) | 6.99 | *3.15* | | 5.53 | *0.81* | | 5.20 | *0.92* | |  |  | 5.96 | *1.05* | | 6.14 | *0.91* | | 5.80 | *1.06* | |  |
| Power in 12-15Hz range (µV2) | 2.54 | *0.89* | | 2.37 | *0.64* | | 2.11 | *0.73* | |  |  | 2.71 | *0.82* | | 2.85 | *1.05* | | 2.46 | *1.01* | |  |
| Power in 11-16Hz range (µV2) | 2.75 | *1.08* | | 2.48 | *0.86* | | 2.20 | *0.81* | |  |  | 2.76 | *0.98* | | 2.92 | *1.13* | | 2.54 | *1.18* | |  |
|  |  |  | |  |  | |  |  | |  |  |  |  | |  |  | |  |  | |  |
| **Memory task** | n=9 |  | |  |  | |  |  | |  |  | n=9 |  | |  |  | |  |  | |  |
| Immediate Recall (IR) | 21.8 | *4.7* | | 19.9 | *4.3* | | 21.5 | *6.6* | |  |  | 23.0 | *7.7* | | 22.1 | *6.5* | | 23.6 | *6.8* | |  |
| Delayed Recall (DR) | 28.9 | *6.3* | | 25.8 | *6.9* | | 29.0 | *7.6* | |  |  | 31.2 | *6.2* | | 31.1 | *4.8* | | 30.3 | *6.6* | |  |
| Performance improvement (DR-IR) | 7.1 | *3.5* | | 5.8 | *5.3* | | 7.5 | *2.9* | |  |  | 8.2 | *2.9* | | 9.1 | *3.8* | | 6.8 | *3.5* | |  |
| Initial Acquisition Rate (%) (IR/DR*100) | 76.2 | *10.4* | | 81.2 | *21.1* | | 73.7 | *8.0* | |  |  | 72.2 | *12.0* | | 70.0 | *13.3* | | 77.2 | *11.0* | |  |

**References**

Bloch, K.E., Schoch, O.D., Zhang, J.N., and Russi, E.W. (1999). German version of the Epworth sleepiness scale. *Respiration* 66**,** 440-447.

Golding, J.F. (2006). Motion sickness susceptibility. *Autonomic Neuroscience* 129**,** 67-76.

Hoddes, E., Zarcone, V., and Dement, W. (1972). Development and use of Stanford Sleepiness Scale (SSS). *Psychophysiology*.

Iber, C., Ancoli-Israel, S., Chesson, A., and Quan, S. (2007). *The AASM manual for the scoring of sleep and associated events: rules, terminology, and technical specification.* Westchester, IL: American Academy of Sleep Medicine.

Johns, M.W. (1991). A new method for measuring daytime sleepiness: the Epworth sleepiness scale. *Sleep* 14**,** 540-545.

Knight, R.G., Waal‐Manning, H.J., and Spears, G.F. (1983). Some norms and reliability data for the State‐Trait Anxiety Inventory and the Zung Self‐Rating Depression scale. *British Journal of Clinical Psychology* 22**,** 245-249.

Meijman, T., De Vries-Griever, A., De Vries, G., and Kampman, R. (1988). The evaluation of the Groningen sleep quality scale. *Groningen: Heymans Bulletin* 2006.
